# Supplementary material for: 3T MRI evaluation of regional catecholamine-producing tumor-induced myocardial injury
Source: PubMed Central journal article supplement (PMC6479192; doi:10.1530/ec-18-0553), 2019-03-25
Supplement: supplementary_table_1.pdf [file supplementary_table_1.pdf]

**Supplementary Table: Magnetic resonance scan parameters**

| Parameters                            | Cine                  | T1-mapping           |
|---------------------------------------|-----------------------|----------------------|
|                                       | Balanced steady-state | Modified Look-Locker |
| Scan sequence                         | free precession       | inversion recovery   |
| Repetition time/echo time, ms         | 60.75/1.08            | 600-750/0.82–1.06    |
| Flip angle, °                         | 40-43                 | 35                   |
| In-plane pixel size, mm               | 1.3 × 1.3             | 1.3-1.8 × 1.3–1.8    |
| Slice thickness, mm                   | 8                     | 8                    |
| Parallel imaging, acceleration factor | 2                     | 2                    |
| Band width, Hz/Px                     | 1302                  | 930–1302             |
| Sampling schema for T1 mapping        | n.a.                  | 8(2)2*               |

\*8(2)2 protocol indicates that there were a total of 2 inversions; 8 images were acquired over 8 inter-beat (RR)

intervals of electrocardiogram after the first inversion, followed by a waiting period of 2 RR intervals, and then 2

images were acquired after the second inversion.
